# Supplementary material
Source: PubMed Central journal article supplement (PMC10114224)

# Supplementary Figure 1

## Amino acid levels in MacTel patients and impact of inclusion of HSAN1 patients

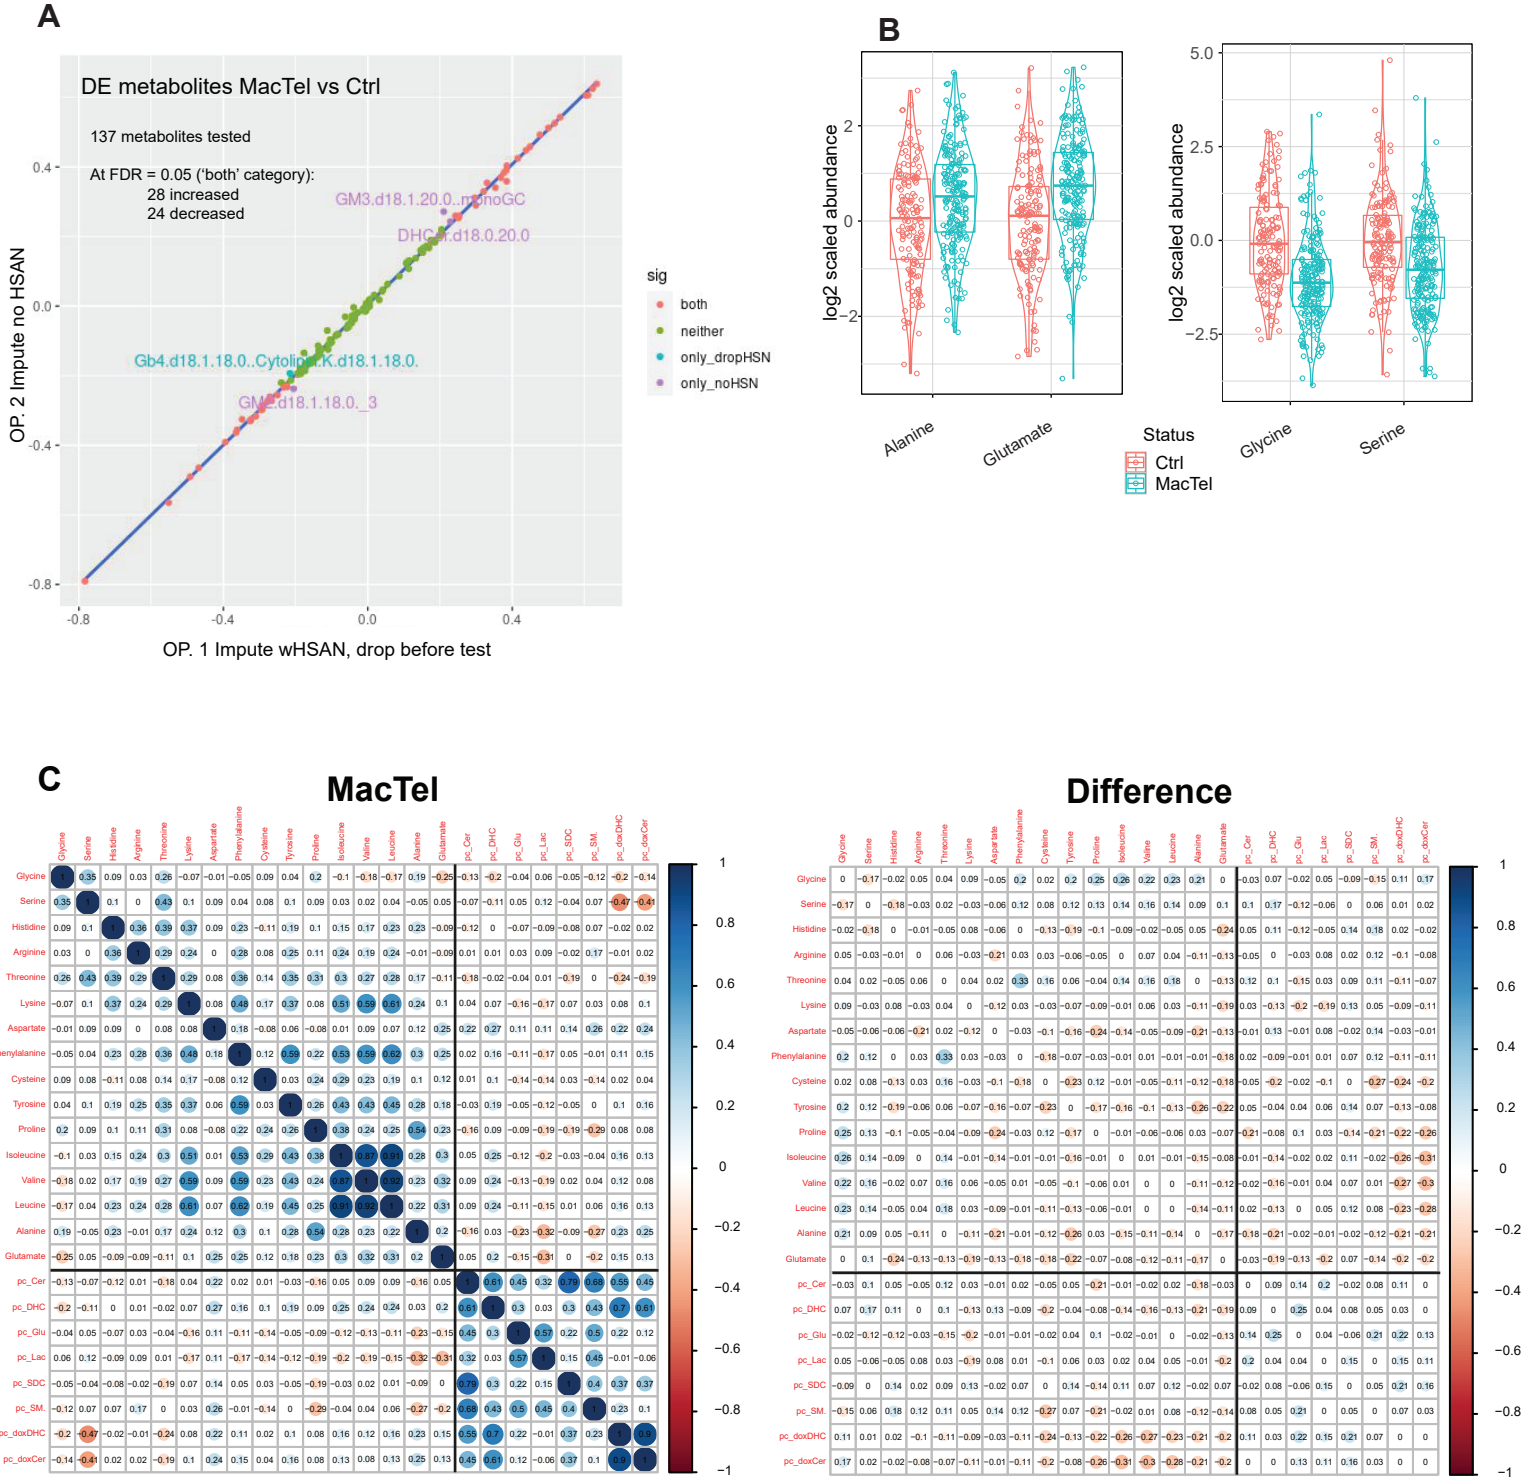

## Supplementary Figure 2

### MacTel patients have elevated doxSL levels and reduced SM

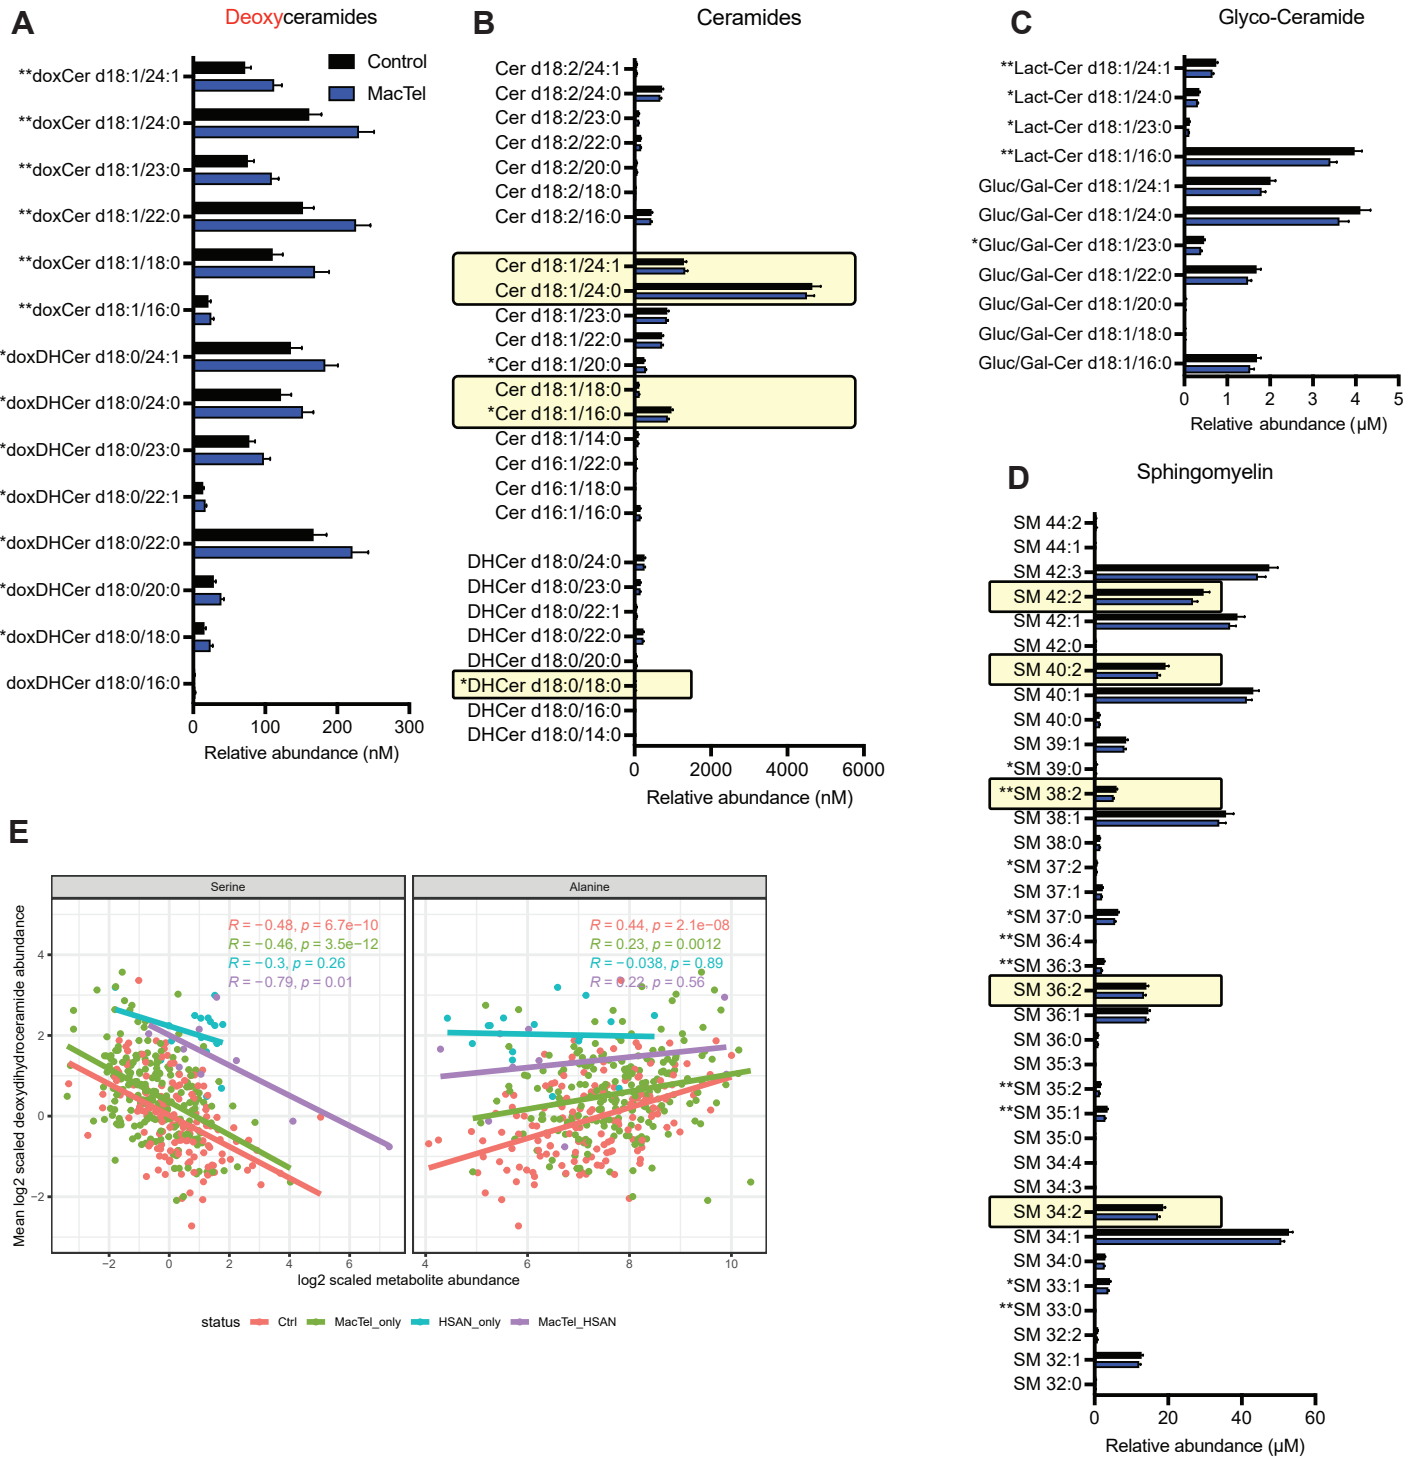

### Supplementary Figure 3 Abundance of SL species in mouse plasma on a serine/glycine-free diet

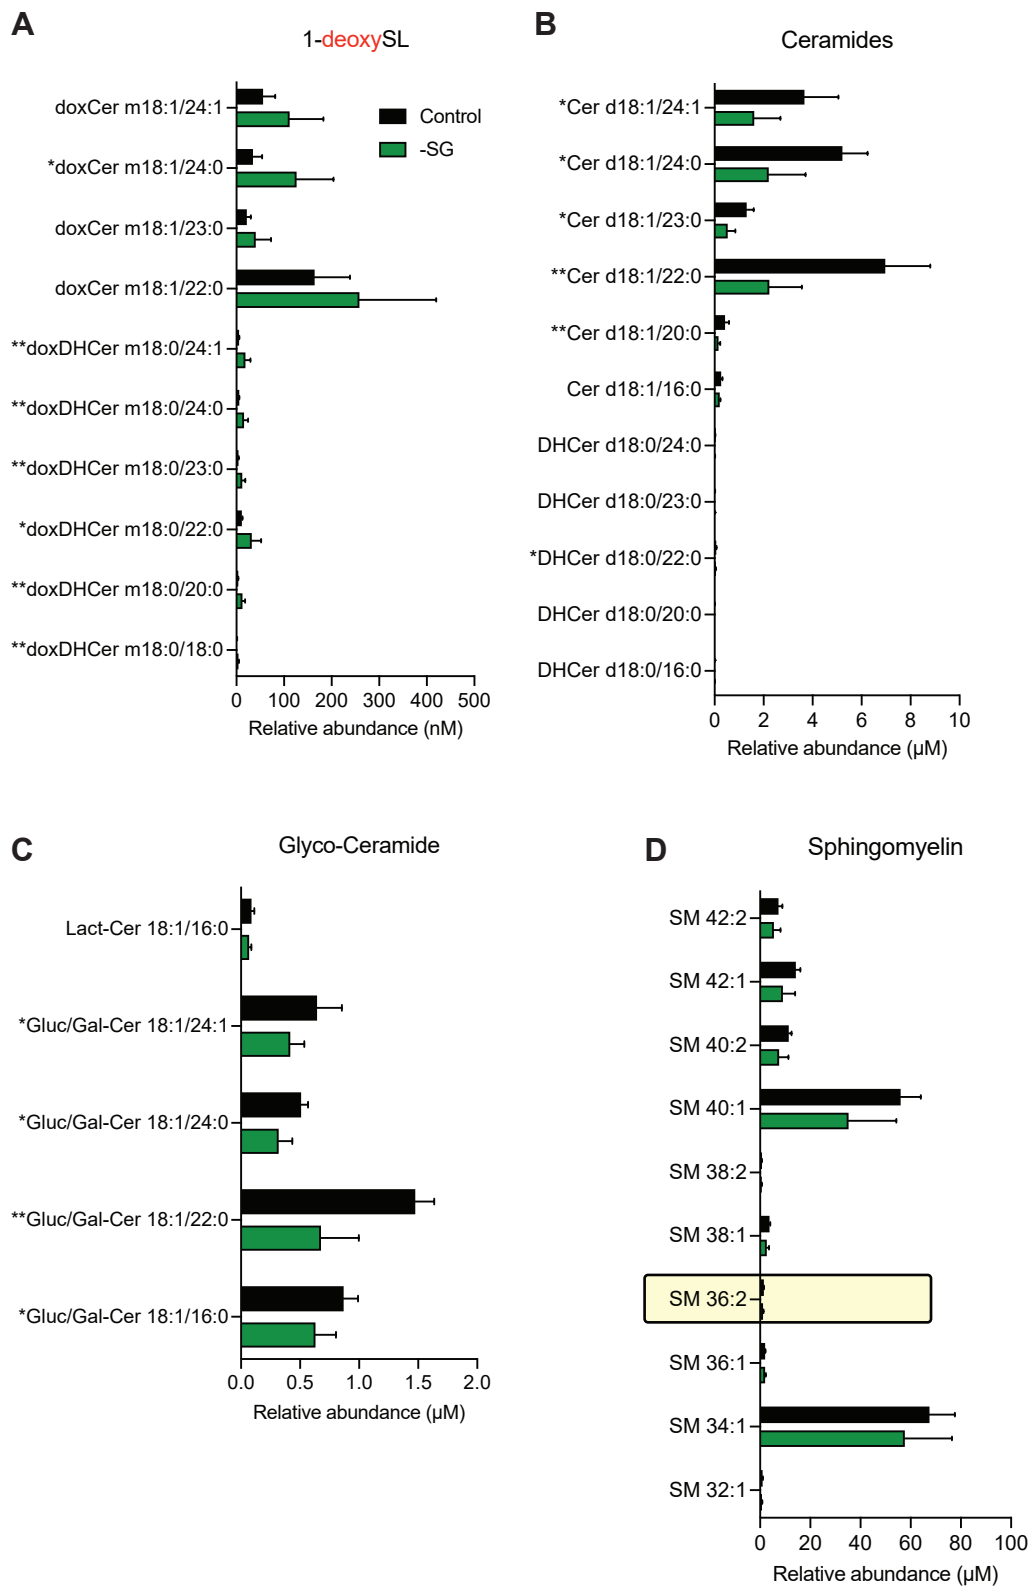

# Supplementary Figure 4

## Relationship between SM and hyperreflectivity

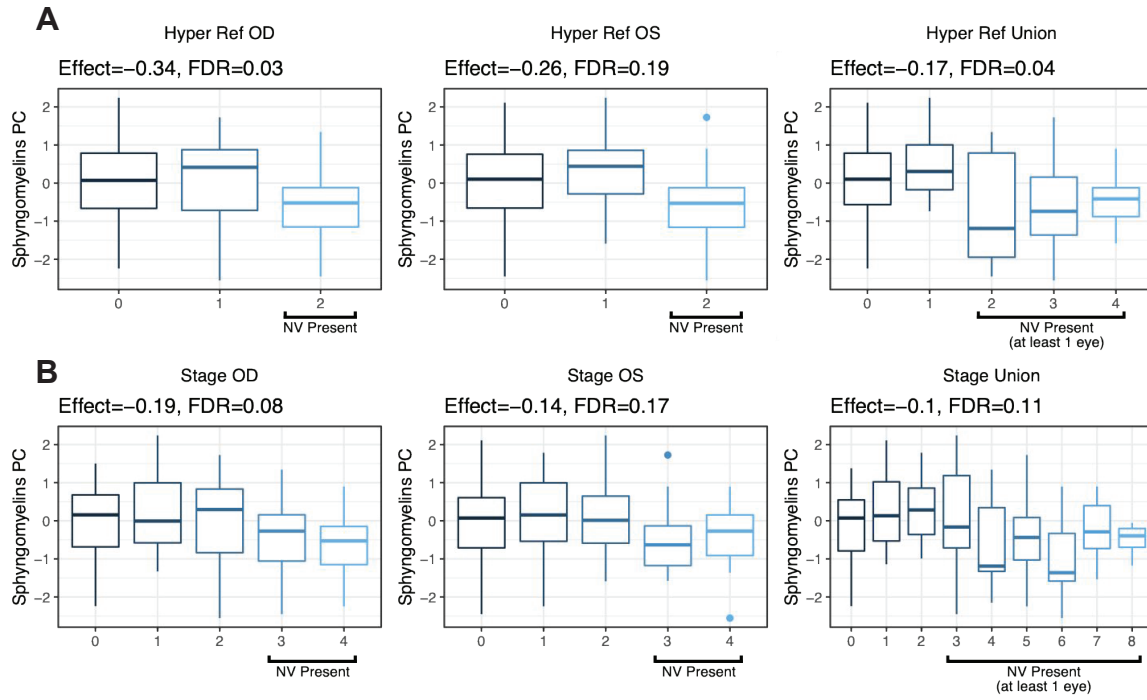

# Supplementary Figure 5

## Impact of excluding serine-supplemented subjects

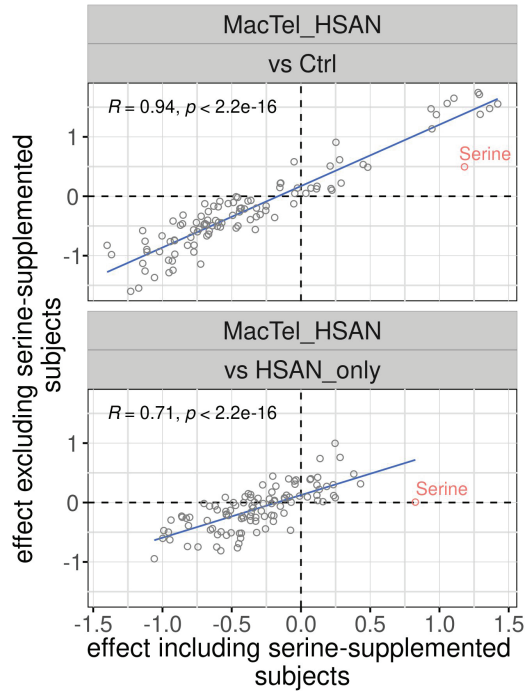

## Supplementary Figure 6

### HSAN1 patients have elevated doxSL and lower levels of most other SL

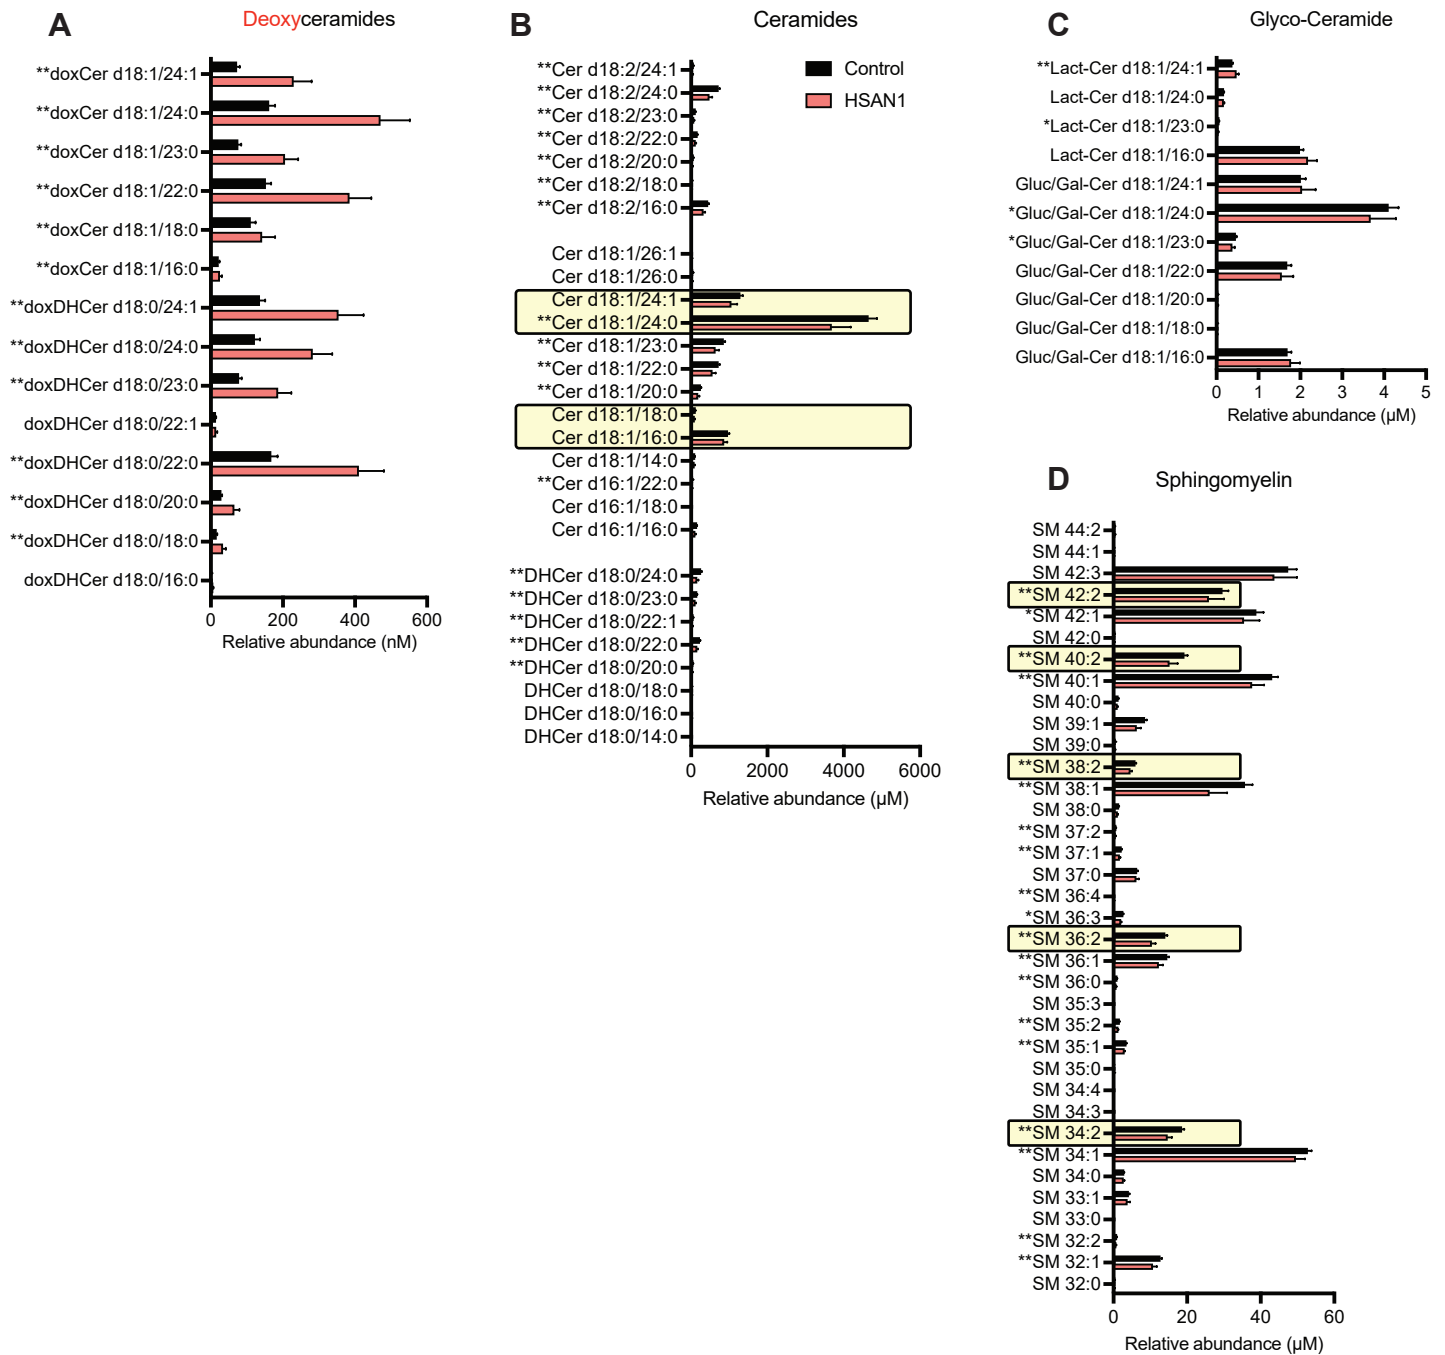

# Supplementary Figure 7

## Relative abundance of SL in HSN1 patients stratified by genetic mutation

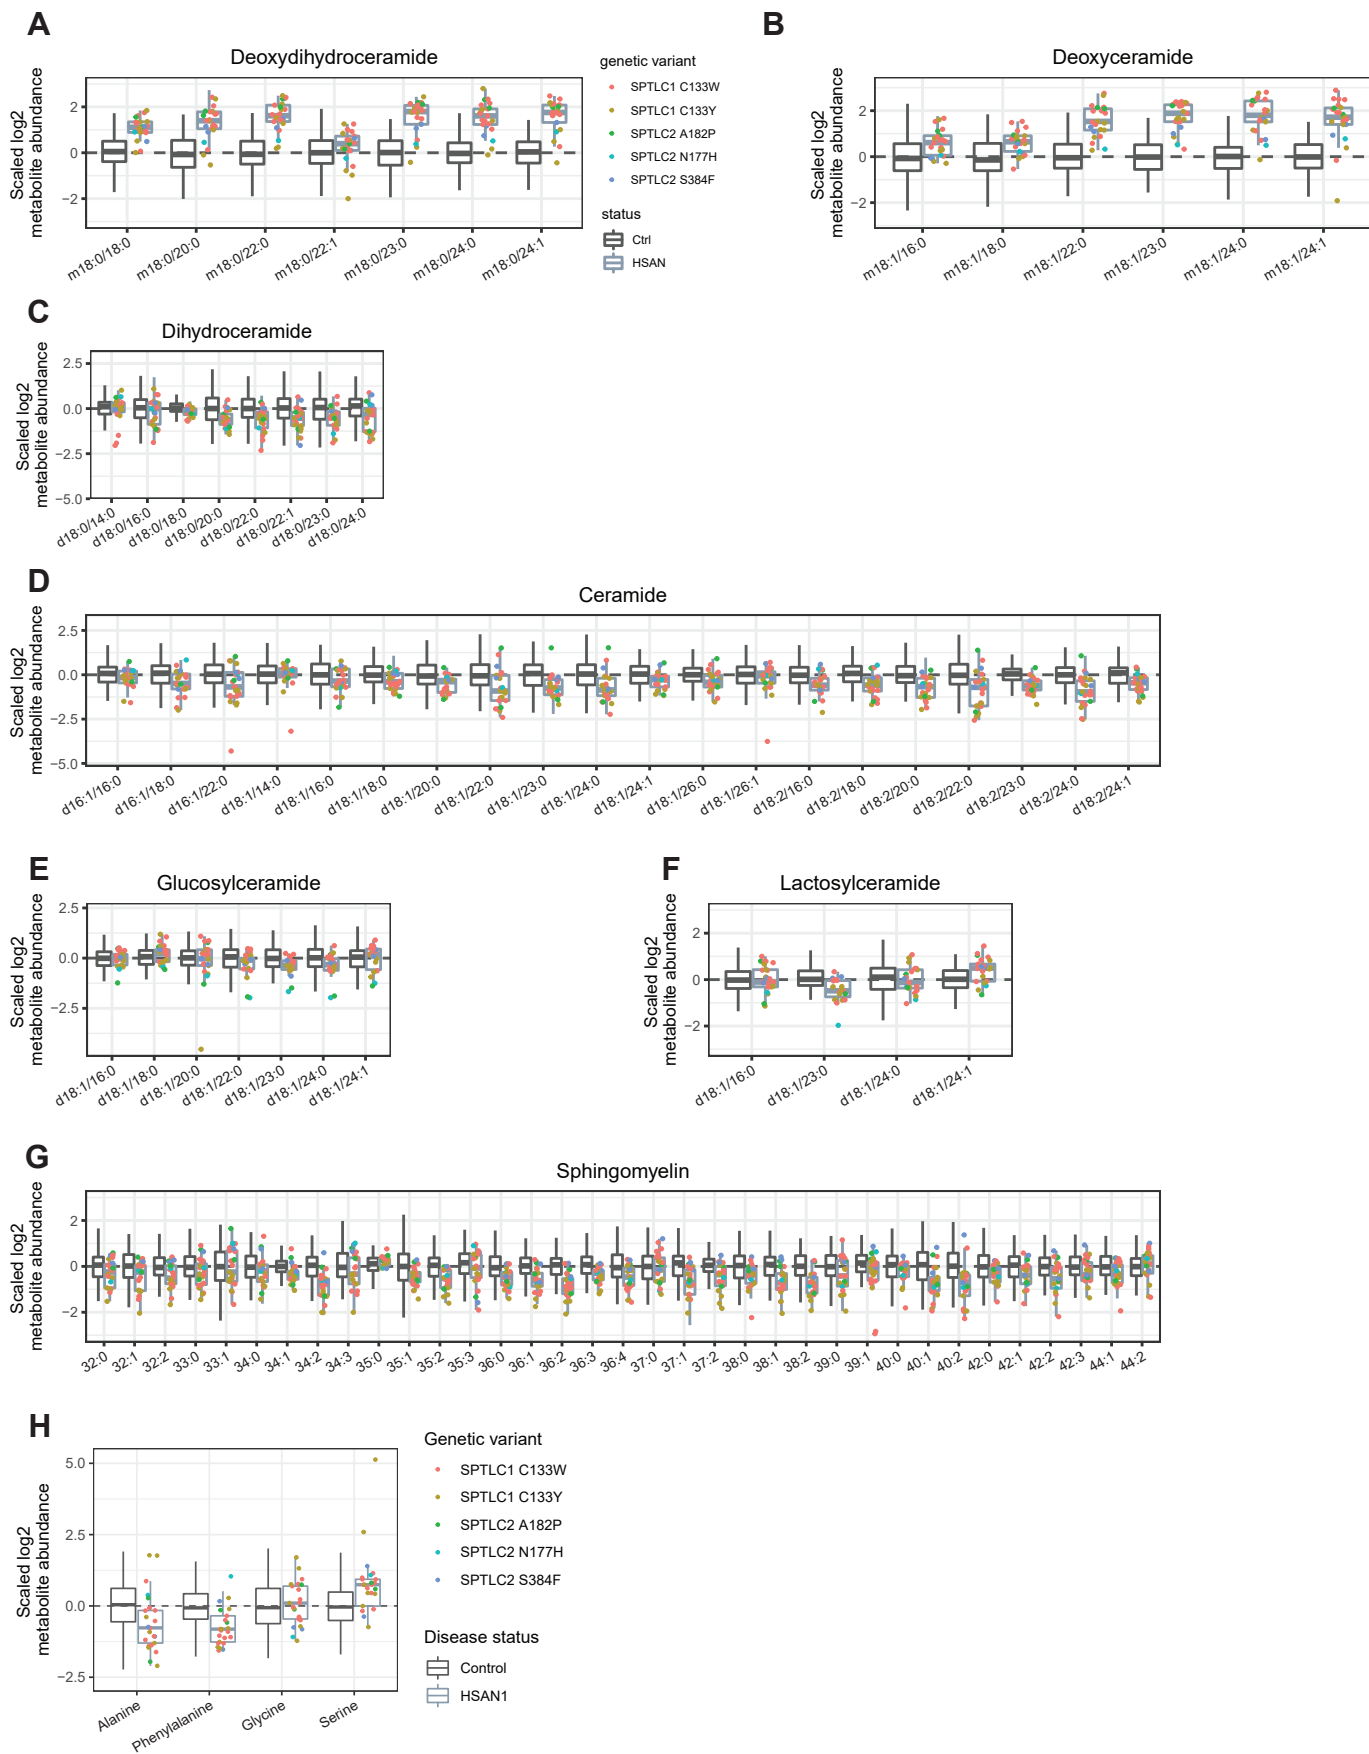

# Supplementary Figure 8

## MacTel patients have distinct SL changes compared to patients with HSAN1

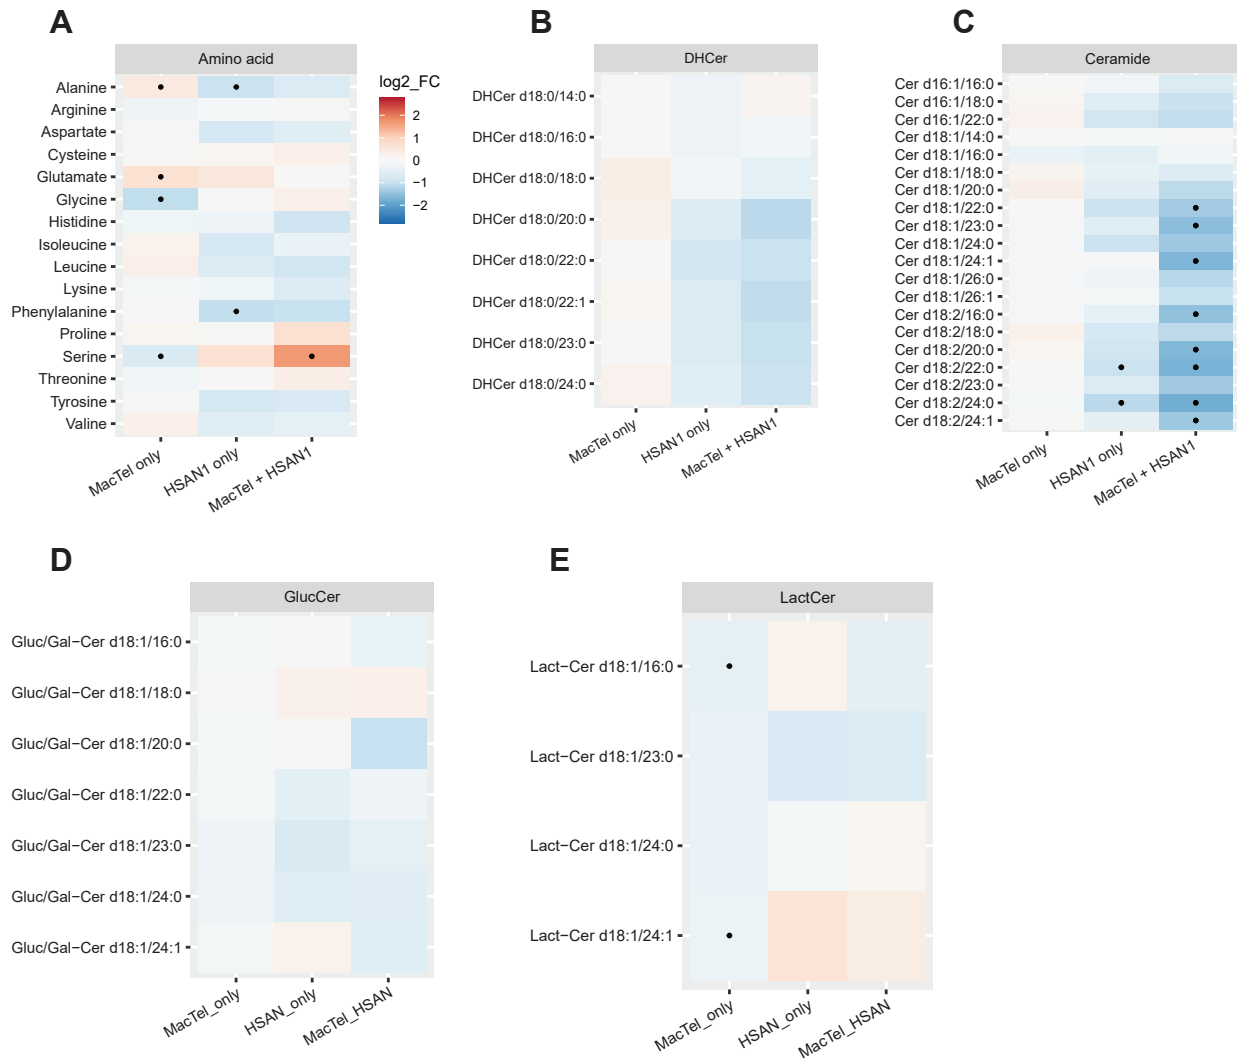

Supplement: mmc2.pdf [file mmc2.pdf]
